# Supplementary material for: Halloysite nanotubes sandwiched between chitosan layers: novel bionanocomposites with multilayer structures
Source: Royal Society of Chemistry journal article supplement (doi:10.1039/c8nj01161c), 2018-01-01
Supplement: c8nj01161c1.pdf [file c8nj01161c1.pdf]

## Halloysite nanotubes sandwiched between chitosan layers: a novel bionanocomposite with multilayer structure

Vanessa Bertolino, Giuseppe Cavallaro\*, Giuseppe Lazzara, Stefana Milioto, Filippo Parisi

Dipartimento di Fisica e Chimica, Università degli Studi di Palermo, Viale delle Scienze, pad. 17, 90128 Palermo, Italy. *giuseppe.cavallaro@unipa.it*

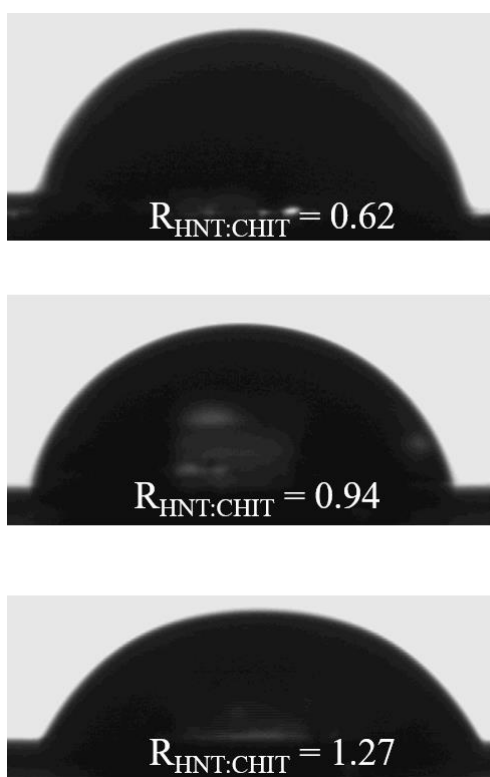

**Figure S1.** Optical images of a water droplet just after the deposition on chitosan/HNTs nanocomposites with variable ratio between HNTs and the total amount of chitosan.

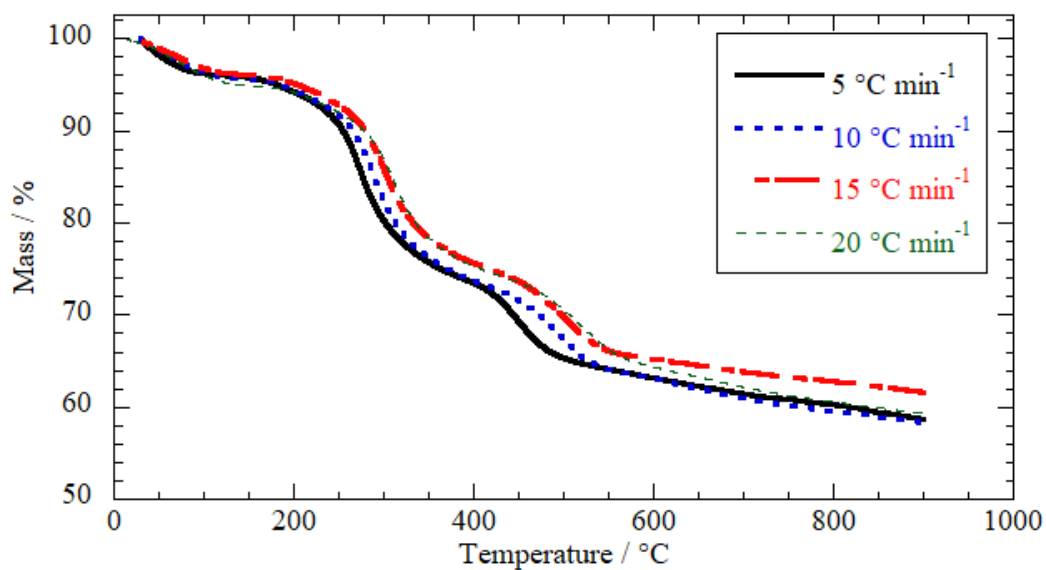

**Figure S2.** Thermogravimetric curves of chitosan/HNTs nanocomposite ( $R_{\text{HNT:CHIT}} = 1.27$ ) at variable heating rate.

**Table S1.** Mass loss in the temperature 25-150 °C for chitosan and chitosan/HNTs nanocomposites.

| $R_{\text{HNT:CHIT}}$ | $ML_{150}^* / \text{wt}\%$ |
|-----------------------|----------------------------|
| 0                     | 7.83                       |
| 0.33                  | 8.39                       |
| 0.48                  | 7.94                       |
| 0.62                  | 7.02                       |
| 0.94                  | 7.43                       |
| 1.27                  | 4.32                       |

\*taken from TG measurements performed at  $10 \text{ }^\circ\text{C min}^{-1}$ .
